# Supplementary material for: Exposure to Violence and Carotid Artery Intima‐Media Thickness in Mexican Women
Source: PubMed Central journal article supplement — J Am Heart Assoc. 2017 Aug 17;6(8):e006249. doi: 10.1161/JAHA.117.006249 (PMC5586461; doi:10.1161/jaha.117.006249), 2017-08-17
Supplement: JAH3-6-e006249-s001.pdf [file JAH3-6-e006249-s001.pdf]

# **SUPPLEMENTAL MATERIAL**

**Table S1. Life Stressor Checklist violence-related items**

---

**Sexual Violence**

(1) “Have you ever been bothered or harassed by sexual remarks, jokes, or demands for sexual favors by someone *at work or school* (for example, a co-worker, a boss, a customer, another student, a teacher)?”

(2) “*Before age 16*, were you ever touched or made to touch someone else in a sexual way because they forced you in some way or threatened to harm you if you didn’t?”

(3) “*After age 16*, were you ever touched or made to touch someone else in a sexual way because they forced you in some way or threatened to harm you if you didn’t?”

(4) “*Before age 16*, did you ever have sex (oral, anal, genital) when you didn’t want to because someone forced you in some way or threatened to harm you if you didn’t?”

(5) “*After age 16*, did you ever have sex (oral, anal, genital) when you didn’t want to because someone forced you in some way or threatened to harm you if you did not?”;

**Physical violence**

(6) “Have you ever been robbed, mugged, or physically attacked (not sexually) by someone you did not know?”

(7) “*Before age 16*, were you ever abused (not sexually) or physically attacked (hit, slapped, choked, burned, or beat up) by someone you knew (for example, a parent, boyfriend, or husband)?”

(8) “*After age 16*, were you ever abused (not sexually) or physically attacked (hit, slapped, choked, burned, or beat up) by someone you knew (for example, a parent, boyfriend, or husband)?”

**Emotional abuse or neglect**

(9) “Have you ever been emotionally abused or neglected (for example, being frequently shamed, embarrassed, ignored, or repeatedly told that you were “no good”)?”

(10) “Have you ever been physically neglected (for example, not fed, not properly clothed, or left to take care of yourself when you were too young or ill)?”

**Observed violence**

(11) “When you were young (before age 16) did you ever see violence between family members (for example, hitting, kicking, slapping, punching)?”

(12) “Have you ever seen a robbery, mugging, or attack taking place?”

---

Possible responses for the questions were yes/no. Each item was followed by sub items which included the age when the event first occurred. All but questions 6, 11, and 12 included sub items on age when the event ended.

**Table S2.** Sensitivity analysis: multivariable-adjusted percent differences of mean IMT (95% CI) according to type of violence and age at first exposure.

|                                            | % difference (95% confidence interval) |                 |
|--------------------------------------------|----------------------------------------|-----------------|
|                                            | n                                      | Multivariable   |
| No exposure                                | 391                                    | ref             |
| Any violence <sup>*†</sup>                 | 243                                    | 1.9 (0.1, 3.8)  |
| Sexual                                     | 45                                     | 1.6 (-1.9, 5.1) |
| Physical                                   | 149                                    | 3.1 (0.9, 5.3)  |
| Physical violence by offender <sup>‡</sup> |                                        |                 |
| No violence                                | 391                                    | ref             |
| Family member                              | 55                                     | 1.6 (-1.6, 4.9) |
| Stranger                                   | 83                                     | 3.9 (1.3, 6.7)  |
| Violence by age at first exposure          |                                        |                 |
| No violence                                | 391                                    | ref             |
| Childhood (< 16y)                          | 55                                     | 1.1 (-1.6, 3.8) |
| Adulthood (≥ 16y)                          | 83                                     | 2.4 (0.3, 4.5)  |

Multivariable: age, state, indigenous, smoking (parents), number of siblings, birth weight, private healthcare, marital status, menopausal status, smoking, alcohol intake, recreational physical activity, body mass index, diabetes, hypertension, and hypercholesterolemia. IMT: intima media thickness.

\*Any includes participants who reported either sexual or physical violence, or both. †49 women reported exposure to both sexual and physical violence. ‡11 women reported violence by both a family member and a stranger.

**Table S3.** Sensitivity analysis: multivariable-adjusted odds ratios for subclinical carotid atherosclerosis (95% CI) according to type of violence and age at first exposure.

|                                            | Odds ratios (95% confidence interval) |                   |
|--------------------------------------------|---------------------------------------|-------------------|
|                                            | n                                     | Multivariable     |
| No exposure                                | 99/292                                | ref               |
| Any violence <sup>*†</sup>                 | 84/159                                | 1.54 (1.03, 2.28) |
| Sexual                                     | 16/29                                 | 1.24 (0.58, 2.64) |
| Physical                                   | 55/94                                 | 1.90 (1.21, 2.99) |
| Physical violence by offender <sup>‡</sup> |                                       |                   |
| No violence                                | 99/292                                | ref               |
| Family member                              | 18/37                                 | 1.64 (0.83, 3.23) |
| Stranger                                   | 32/51                                 | 1.92 (1.10, 3.34) |
| Violence by age at first exposure          |                                       |                   |
| No violence                                | 99/292                                | ref               |
| Childhood (< 16y)                          | 25/60                                 | 1.06 (0.59, 1.92) |
| Adulthood (≥ 16y)                          | 59/99                                 | 1.85 (1.18, 2.89) |

Multivariable: age, state, indigenous, smoking (parents), number of siblings, birth weight, private healthcare, marital status, menopausal status, smoking, alcohol intake, recreational physical activity, body mass index, diabetes, hypertension, and hypercholesterolemia. IMT: intima media thickness.

<sup>\*</sup>Any includes participants who reported either sexual or physical violence, or both. <sup>†</sup>49 women reported exposure to both sexual and physical violence. <sup>‡</sup>11 women reported violence by both a family member and a stranger.
